# Supplementary material
Source: Springer Nature journal article supplement (https://www.springermedizin.de/resource/supplementary/12884_2009_304_MOESM1_ESM.pdf/9457416)

**Indian first birth**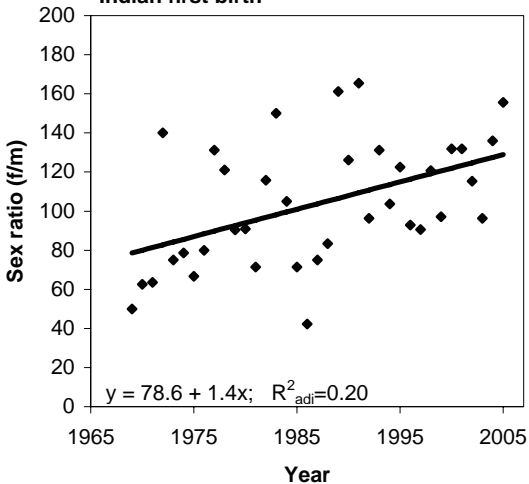**Pakistani first birth**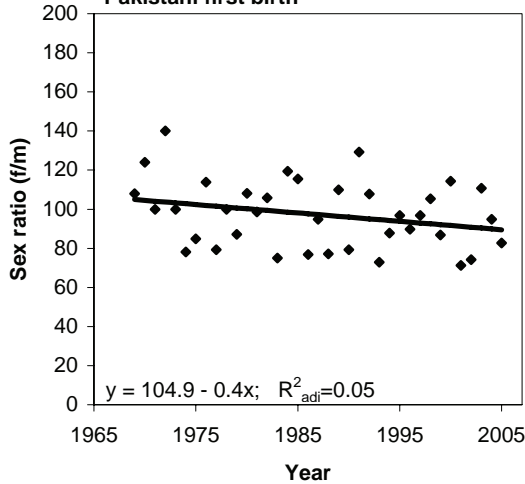**Indian last birth**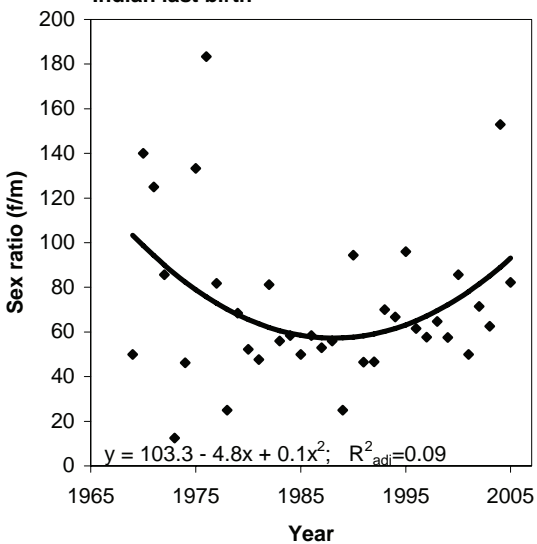**Pakistani last birth**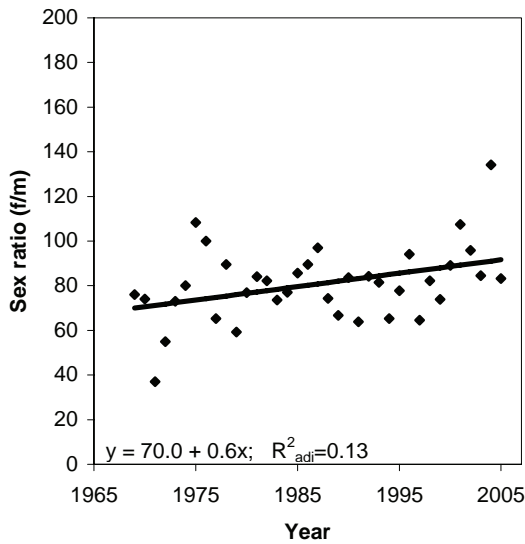

Supplement: MOESM1 [file 9457416]
